# Supplementary material for: An insect antifreeze protein fromAnatolica politaenhances the cryoprotection ofXenopus laeviseggs and embryos
Source: Oxford University Press journal article supplement (doi:10.1242/jeb.243662), 2022-01-11
Supplement: jeb243662supp.pdf [file jeb243662supp.pdf]

a

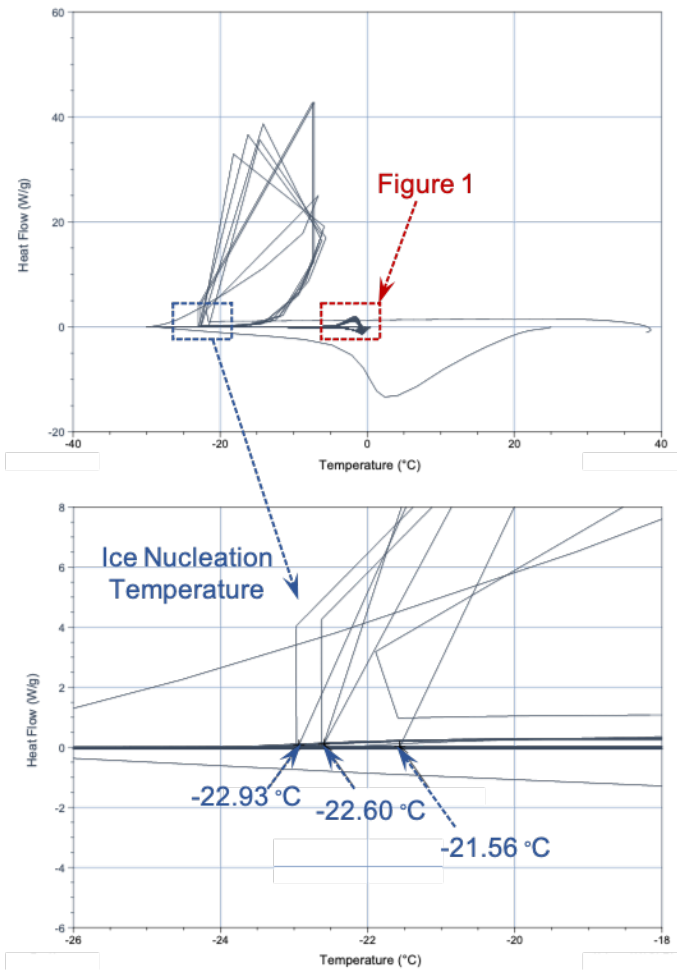

b

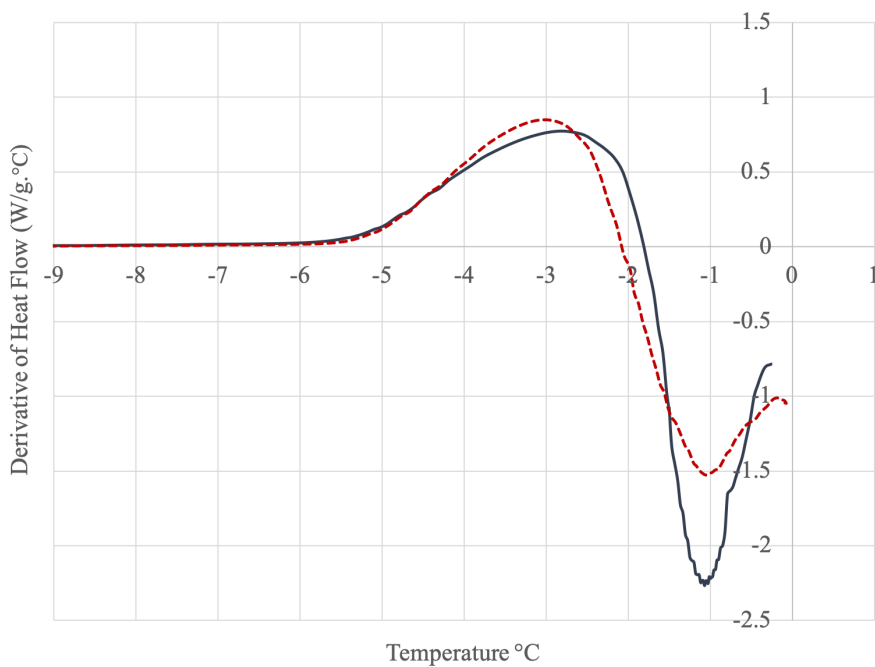

**Fig. S1. Ice nucleation temperature for 180  $\mu$ M solution of Trx-ApAFP752 in buffer (50 mM K<sub>2</sub>HPO<sub>4</sub>, 20 mM NaCl, pH 8) analyzed via differential scanning calorimetry.**

a) The top panel is the full temperature range showing all cycles, with indication of what portion of the figure was used for Figure 1 in the text. The bottom panel is a focused view for later heating cycles which show 3 repetitions of cooling cycles and their respective nucleation temperatures observed as large exotherms. b) THA activity is retained after lyophilization. Differential scanning calorimetry (DSC) was used to assay thermal hysteresis for the antifreeze protein (180  $\mu$ M solution of AFP in buffer: 50 mM K<sub>2</sub>HPO<sub>4</sub>, 20 mM NaCl, pH 8). Here, two samples are contrasted of the Trx-ApAFP752 protein (pre-lyophilization in solid dark blue, after lyophilization in dashed red) highlighting only the specific cooling cycle used to determine thermal hysteresis for those samples. In contrast to Figure 1 in the main text, here we plot the derivative of the heat flow for that cycle which allows us to more easily observe the rapid change in slope at the onset of freezing near the first minimum just under 0 °C. This depression in freezing point (i.e., THA) was observed to be the same for the protein both before and after lyophilization.

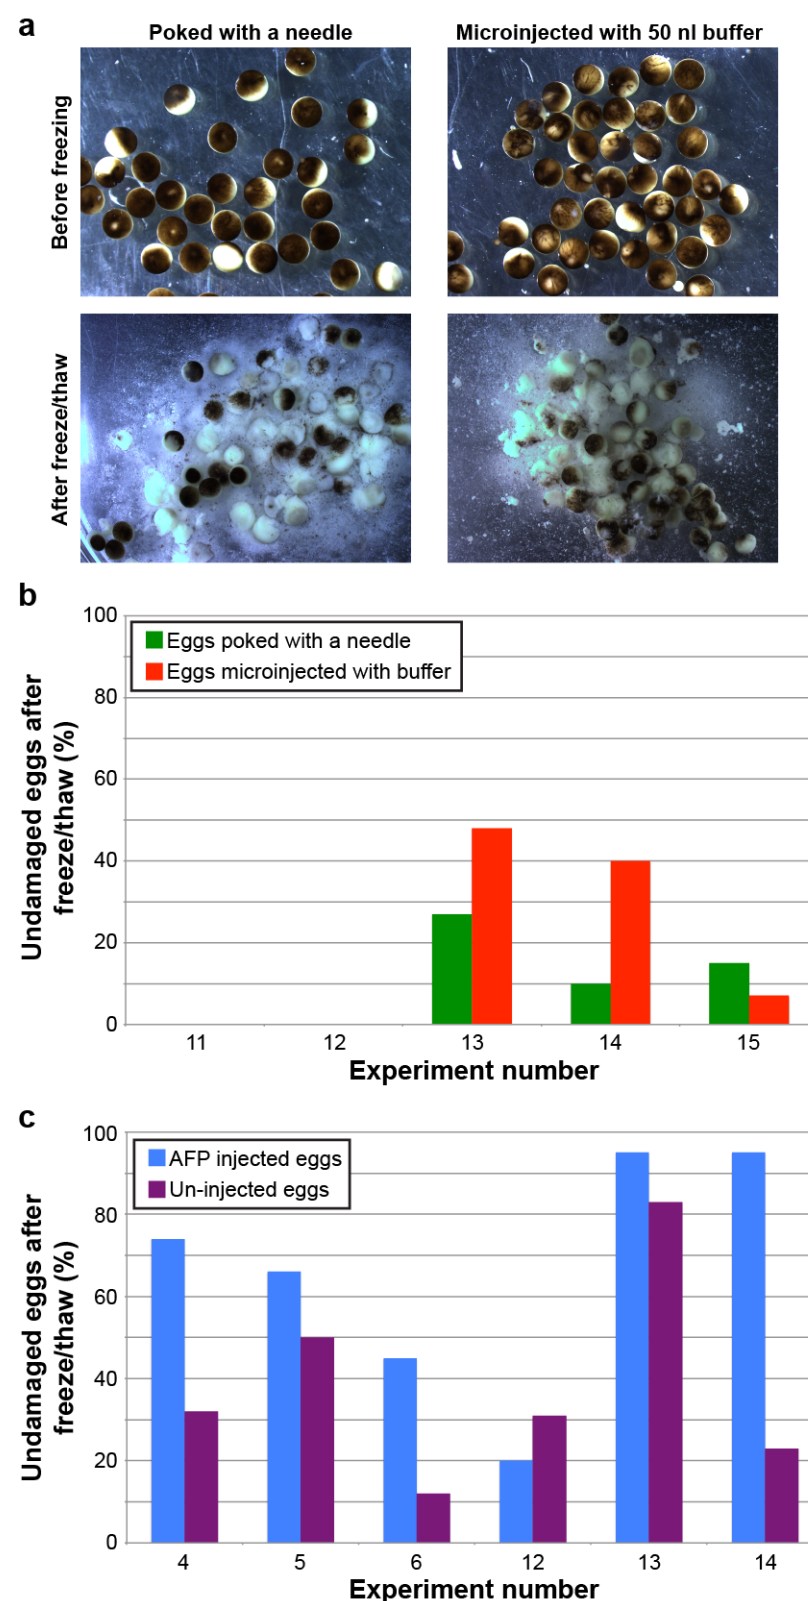

**Fig. S2. Puncturing eggs renders them susceptible to freeze/thaw damage, and un-injected eggs exhibit variable sensitivity to freezing.** a) Eggs were punctured with a microinjection needle or microinjected with 50 nL of buffer and subjected to freeze/thaw, as described in Figure 3. Representative images are shown. b) Quantification of data from a). For each approach, five independent experiments were performed using 10-40 eggs per experiment. The average  $\pm$  SD for percentage of undamaged eggs was  $10 \pm 11\%$  for poked eggs and  $19 \pm 23\%$  for buffer injected eggs, and the difference between the two conditions was not statistically significant by Student's t-test. c) Experiments were performed as in Figure 3 with eggs that were either un-injected or microinjected with  $5 \mu\text{M}$  AFP. Experimental conditions are summarized in Table S1.

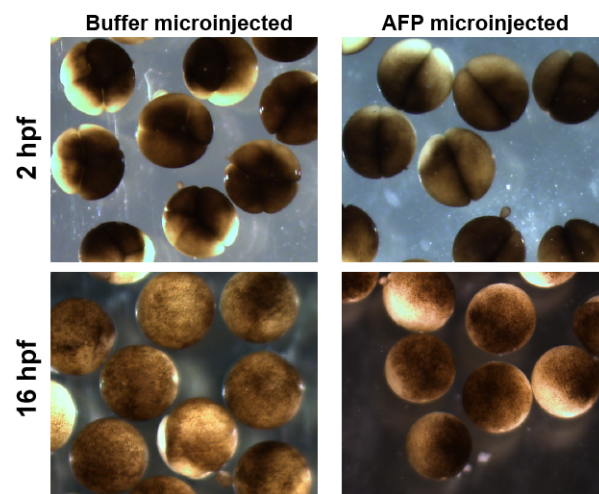

**Fig. S3. AFP is not toxic for early *X. laevis* development.** One-cell *X. laevis* embryos were microinjected with 5  $\mu$ M AFP or buffer as described in Figure 3. Embryos were not subjected to freeze/thaw, allowed to develop at room temperature, and imaged at different times, indicated in hours post fertilization (hpf). Two independent experiments were performed using different batches of embryos. Table S3 summarizes the number of embryos that were injected at the one-cell stage, the number of embryos that reached gastrulation (16 hpf), and microinjection conditions for each experiment.

**Table S1. Compiled microinjection data for eggs.** All data from egg microinjections are shown.

| Exp. # | Microinjection                                      | Freeze/thaw condition | AFP used                  | Total # of eggs | % undamaged eggs |
|--------|-----------------------------------------------------|-----------------------|---------------------------|-----------------|------------------|
| 1      | 5 $\mu$ M Trx-ApAFP <sup>I</sup>                    | A                     | Batch 1: fresh            | 50              | 96%              |
|        | Buffer <sup>II</sup>                                | A                     |                           | 30              | 13%              |
| 2      | 5 $\mu$ M Trx-ApAFP <sup>I</sup>                    | A                     | Batch 1: fresh            | 61              | 75%              |
|        | Buffer <sup>II</sup>                                | A                     |                           | 64              | 50%              |
| 3      | 5 $\mu$ M Trx-ApAFP <sup>I</sup>                    | A                     | Batch 1: fresh            | 93              | 67%              |
|        | Buffer <sup>II</sup>                                | A                     |                           | 105             | 41%              |
| 4      | 5 $\mu$ M Trx-ApAFP <sup>I</sup>                    | B                     | Batch 2: fresh            | 39              | 74%              |
|        | 5 $\mu$ M heat-inactivated Trx-ApAFP <sup>III</sup> | B                     | Batch 2: heat-inactivated | 22              | 9%               |
|        | Not microinjected                                   | B                     |                           | 19              | 32%              |
| 5      | 5 $\mu$ M Trx-ApAFP <sup>I</sup>                    | A                     | Batch 2: fresh            | 29              | 66%              |
|        | 5 $\mu$ M heat-inactivated Trx-ApAFP <sup>III</sup> | A                     | Batch 2: heat-inactivated | 15              | 7%               |
|        | Not microinjected                                   | A                     |                           | 12              | 50%              |
| 6      | 5 $\mu$ M Trx-ApAFP <sup>I</sup>                    | A                     | Batch 2: fresh            | 22              | 45%              |
|        | 5 $\mu$ M heat-inactivated Trx-ApAFP <sup>III</sup> | A                     | Batch 2: heat-inactivated | 21              | 5%               |
|        | Not microinjected                                   | A                     |                           | 17              | 12%              |
| 7      | 5 $\mu$ M Trx-ApAFP <sup>I</sup>                    | A                     | Batch 2: 3 weeks at 4°C   | 60              | 47%              |
|        | 5 $\mu$ M heat-inactivated Trx-ApAFP <sup>III</sup> | A                     | Batch 2: heat-inactivated | 63              | 32%              |
| 8      | 5 $\mu$ M Trx-ApAFP <sup>I</sup>                    | C                     | Batch 3: fresh            | 94              | 63%              |
|        | 5 $\mu$ M heat-inactivated Trx-ApAFP <sup>III</sup> | C                     | Batch 3: heat-inactivated | 103             | 35%              |
| 9      | 5 $\mu$ M Trx-ApAFP <sup>I</sup>                    | C                     | Batch 3: 2 weeks at 4°C   | 15              | 73%              |
|        | 5 $\mu$ M heat-inactivated Trx-ApAFP <sup>III</sup> | C                     | Batch 3: heat-inactivated | 15              | 13%              |
|        | 5 $\mu$ M lyophilized Trx-ApAFP <sup>I</sup>        | C                     | Batch 3: lyophilized      | 15              | 73%              |
|        | 2 $\mu$ M lyophilized Trx-ApAFP <sup>IV</sup>       | C                     | Batch 3: lyophilized      | 15              | 13%              |
| 10     | 5 $\mu$ M Trx-ApAFP <sup>I</sup>                    | C                     | Batch 3: 2 weeks at 4°C   | 33              | 58%              |
|        | 5 $\mu$ M heat-inactivated Trx-ApAFP <sup>III</sup> | C                     | Batch 3: heat-inactivated | 39              | 18%              |
|        | 5 $\mu$ M lyophilized Trx-ApAFP <sup>I</sup>        | C                     | Batch 3: lyophilized      | 39              | 41%              |

|    |                                               |   |                             |    |      |
|----|-----------------------------------------------|---|-----------------------------|----|------|
|    | 2 $\mu$ M lyophilized Trx-ApAFP <sup>IV</sup> | C | Batch 3: lyophilized        | 36 | 19%  |
| 11 | 5 $\mu$ M Trx-ApAFP <sup>I</sup>              | A | Batch 4: fresh              | 9  | 100% |
|    | Buffer <sup>II</sup>                          | A |                             | 10 | 0%   |
|    | Not microinjected                             | A |                             | 10 | 20%  |
|    | Poked with a microinjection needle            | A |                             | 10 | 0%   |
| 12 | 5 $\mu$ M Trx-ApAFP <sup>I</sup>              | A | Batch 4: fresh              | 15 | 20%  |
|    | Buffer <sup>II</sup>                          | A |                             | 16 | 0%   |
|    | Not microinjected                             | A |                             | 13 | 31%  |
|    | 1 $\mu$ M Trx-ApAFP <sup>V</sup>              | A | Batch 4: fresh              | 15 | 0%   |
|    | Poked with a microinjection needle            | A |                             | 16 | 0%   |
| 13 | 5 $\mu$ M lyophilized Trx-ApAFP <sup>I</sup>  | A | Batch 3: lyophilized (aged) | 40 | 95%  |
|    | Buffer <sup>II</sup>                          | A |                             | 40 | 48%  |
|    | Not microinjected                             | A |                             | 40 | 83%  |
|    | 1 $\mu$ M lyophilized Trx-ApAFP <sup>V</sup>  | A | Batch 3: lyophilized (aged) | 40 | 38%  |
|    | Poked with a microinjection needle            | A |                             | 40 | 27%  |
| 14 | 5 $\mu$ M lyophilized Trx-ApAFP <sup>I</sup>  | A | Batch 3: lyophilized (aged) | 40 | 95%  |
|    | Buffer <sup>II</sup>                          | A |                             | 40 | 40%  |
|    | Not microinjected                             | A |                             | 40 | 23%  |
|    | 1 $\mu$ M lyophilized Trx-ApAFP <sup>V</sup>  | A | Batch 3: lyophilized (aged) | 40 | 45%  |
|    | Poked with a microinjection needle            | A |                             | 40 | 10%  |
| 15 | Buffer <sup>II</sup>                          | A |                             | 41 | 7%   |
|    | Poked with a microinjection needle            | A |                             | 41 | 15%  |

Buffer = 20 mM Tris, 20 mM NaCl, pH 7.5

Each experiment was conducted with a different batch of unfertilized *X. laevis* eggs

A: Eggs were equilibrated in 0.5x Ringer + 6% Ficoll prior to microinjection. After microinjection, eggs were incubated in the same buffer for 1 hour at room temperature, moved to 5 ml 0.5x Ringer without Ficoll, and placed at -20°C for 15 minutes until the buffer had frozen. Eggs were then thawed at room temperature for 45 minutes and imaged. Cooling at -1.0 °C/min; thawing at +0.3 °C/min.

B: Eggs were equilibrated in 0.5x Ringer + 6% Ficoll prior to microinjection. After microinjection, eggs were incubated in the same buffer for 45 minutes at room temperature and moved to 5 ml 0.5x Ringer without Ficoll. The dish of eggs in buffer was then placed in a surrounding iso-propanol bath at -20°C overnight. The iso-propanol bath ensures the eggs freeze slowly. Note that the eggs themselves were not placed directly in iso-propanol. As such, the buffer and eggs ultimately reached -20 °C and froze. After overnight at -20 °C, eggs were then thawed at room temperature for 45 minutes and imaged. Cooling at -0.7 °C/min; thawing at +0.3 °C/min.

C: Eggs were equilibrated in 0.5x Ringer + 6% Ficoll prior to microinjection. After microinjection, eggs were incubated in the same buffer for 45 minutes at room temperature, moved to 5 ml 0.5x Ringer/10% DMSO/20% FBS, placed on ice for 30 minutes, and placed in an iso-propanol bath at -20°C overnight (as described for condition B). Eggs were then thawed at room temperature for 45 minutes and imaged. Cooling at -0.8 °C/min; thawing at +0.2 °C/min.

<sup>I</sup> Microinjected 50 nl of 105-117  $\mu$ M Trx-ApAFP stock

<sup>II</sup> Microinjected 50 nl of buffer

<sup>III</sup> Microinjected 50 nl of 105-117  $\mu$ M Trx-ApAFP stock that had first been heat-inactivated at 55°C for 15 minutes

<sup>IV</sup> Microinjected 50 nl of 50  $\mu$ M Trx-ApAFP stock

<sup>V</sup> Microinjected 10 nl of 105  $\mu$ M Trx-ApAFP stock

Aged: Lyophilized and stored at room temperature for ~17 months

**Table S2. Compiled microinjection data for embryos.** All data from embryo microinjections are shown.

| Exp. # | Microinjection                                      | AFP used                  | Total # of embryos | % undamaged embryos | % embryos developed |
|--------|-----------------------------------------------------|---------------------------|--------------------|---------------------|---------------------|
| 1      | 5 $\mu$ M Trx-ApAFP <sup>I</sup>                    | Batch 1: fresh            | 20                 | 80%                 | ND                  |
|        | Buffer <sup>II</sup>                                |                           | 20                 | 30%                 | ND                  |
| 2      | 5 $\mu$ M Trx-ApAFP <sup>I</sup>                    | Batch 2: fresh            | 11                 | 88%                 | 36% <sup>G</sup>    |
|        | 5 $\mu$ M heat-inactivated Trx-ApAFP <sup>III</sup> | Batch 2: heat-inactivated | 11                 | 18%                 | 0% <sup>G</sup>     |
|        | Not microinjected                                   |                           | 10                 | 10%                 | 0% <sup>G</sup>     |
| 3      | 5 $\mu$ M Trx-ApAFP <sup>I</sup>                    | Batch 2: fresh            | 24                 | 63%                 | 30% <sup>St7</sup>  |
|        | 5 $\mu$ M heat-inactivated Trx-ApAFP <sup>III</sup> | Batch 2: heat-inactivated | 20                 | 30%                 | 5% <sup>St7</sup>   |
| 4      | 5 $\mu$ M Trx-ApAFP <sup>I</sup>                    | Batch 3: fresh            | 20                 | 5%                  | ND                  |
|        | 5 $\mu$ M heat-inactivated Trx-ApAFP <sup>III</sup> | Batch 3: heat-inactivated | 20                 | 20%                 | ND                  |
|        | Not microinjected                                   |                           | 20                 | 35%                 | ND                  |
| 5      | 5 $\mu$ M Trx-ApAFP <sup>I</sup>                    | Batch 3: fresh            | 40                 | 55%                 | ND                  |
|        | 5 $\mu$ M heat-inactivated Trx-ApAFP <sup>III</sup> | Batch 3: heat-inactivated | 40                 | 8%                  | ND                  |
|        | Not microinjected                                   |                           | 40                 | 88%                 | ND                  |
| 6      | 5 $\mu$ M Trx-ApAFP <sup>I</sup>                    | Batch 4: fresh            | 20                 | 25%                 | ND                  |
|        | Buffer <sup>II</sup>                                |                           | 20                 | 30%                 | ND                  |
|        | Not microinjected                                   |                           | 20                 | 40%                 | ND                  |
| 7      | 5 $\mu$ M lyophilized Trx-ApAFP <sup>I</sup>        | Batch 4: lyophilized      | 20                 | 10%                 | ND                  |
|        | Buffer <sup>II</sup>                                |                           | 20                 | 10%                 | ND                  |
|        | Not microinjected                                   |                           | 20                 | 30%                 | ND                  |
|        | 1 $\mu$ M lyophilized Trx-ApAFP <sup>IV</sup>       | Batch 4: lyophilized      | 20                 | 15%                 | ND                  |
| 8      | GFP-AFP mRNA <sup>V</sup>                           | mRNA                      | 15                 | 40%                 | ND                  |
|        | AFP mRNA <sup>V</sup>                               | mRNA                      | 15                 | 47%                 | ND                  |
|        | Water <sup>VI</sup>                                 |                           | 15                 | 7%                  | ND                  |
|        | Not microinjected                                   |                           | 15                 | 0%                  | ND                  |
| 9      | GFP-AFP mRNA <sup>V</sup>                           | mRNA                      | 15                 | 13%                 | ND                  |
|        | AFP mRNA <sup>V</sup>                               | mRNA                      | 15                 | 20%                 | ND                  |
|        | Water <sup>VI</sup>                                 |                           | 15                 | 20%                 | ND                  |
|        | Not microinjected                                   |                           | 15                 | 33%                 | ND                  |

Buffer = 20 mM Tris, 20 mM NaCl, pH 7.5

Each experiment was conducted with a different batch of *X. laevis* embryos

Freeze/thaw conditions for AFP recombinant protein microinjection experiments #1-7: One-cell stage embryos were equilibrated in 0.5x Ringer + 6% Ficoll prior to microinjection. After microinjection, embryos were incubated in the same buffer at room temperature until they reached stage 4-5. Embryos were then moved to 5 ml 0.5x Ringer without Ficoll, and placed at -20°C for 15 minutes until the buffer had frozen. Embryos were then thawed at room temperature for 45 minutes and imaged.

Freeze/thaw conditions for AFP mRNA microinjection experiments #8-9: One-cell stage embryos were equilibrated in 0.5x Ringer + 6% Ficoll prior to microinjection. After microinjection, embryos were incubated at room temperature until they reached stage 8-9. Embryos were placed in 5 ml 0.5x Ringer without Ficoll at -20°C for 15 minutes until the buffer had frozen. Embryos were then thawed at room temperature for 45 minutes and imaged.

<sup>I</sup> Microinjected 50 nl of 105-117  $\mu$ M Trx-ApAFP stock

<sup>II</sup> Microinjected 50 nl of buffer

<sup>III</sup> Microinjected 50 nl of 105-117  $\mu$ M Trx-ApAFP stock that had first been heat-inactivated at 55°C for 15 minutes

<sup>IV</sup> Microinjected 10 nl of 105  $\mu$ M Trx-ApAFP stock

<sup>V</sup> Microinjected 500 pg mRNA

<sup>VI</sup> Microinjected 10 nl of water

ND Not determined

<sup>G</sup> Reached gastrula stage

<sup>St7</sup> Reached stage 7

**Table S3. Compiled data for embryos that were microinjected, not subjected to freeze/thaw, and allowed to develop at room temperature.** All data from embryo microinjections are shown.

| Exp. # | Microinjection              | AFP used       | Total # of embryos injected at 1-cell stage | Total # of viable embryos at 16 hpf |
|--------|-----------------------------|----------------|---------------------------------------------|-------------------------------------|
| 1      | 5 µM Trx-ApAFP <sup>I</sup> | Batch 1: fresh | 70                                          | 55 <sup>G</sup>                     |
|        | Buffer <sup>II</sup>        |                | 68                                          | 57 <sup>G</sup>                     |
| 2      | 5 µM Trx-ApAFP <sup>I</sup> | Batch 2: fresh | 20                                          | 16 <sup>G</sup>                     |
|        | Buffer <sup>II</sup>        |                | 20                                          | 16 <sup>G</sup>                     |

One-cell stage embryos were equilibrated in 0.5x Ringer + 6% Ficoll prior to microinjection. After microinjection, embryos were incubated in the same buffer at room temperature until they reached stage 4-5. Embryos were then moved to 0.5x Ringer without Ficoll and incubated at room temperature.

Buffer = 20 mM Tris, 20 mM NaCl, pH 7.5  
Each experiment was conducted with a different batch of *X. laevis* embryos

<sup>I</sup> Microinjected 50 nl of 105-117 µM Trx-ApAFP stock  
<sup>II</sup> Microinjected 50 nl of buffer

<sup>G</sup> Reached gastrula stage
